# Supplementary material
Source: PubMed Central journal article supplement (PMC3061532)
Supplement: supp_110.172171_JPET_172171_Fig_1.pdf [file supp_110.172171_JPET_172171_Fig_1.pdf]

# Pregabalin modulation of neurotransmitter release is mediated by change in intrinsic activation/inactivation properties of CaV2.1 calcium channels.

Mariano N. Di Guilmi, Francisco J. Urbano, Carlota Gonzalez Inchauspe and Osvaldo D. Uchitel

Journal of Pharmacology and Experimental Therapeutics

## Supplementary Figure 1

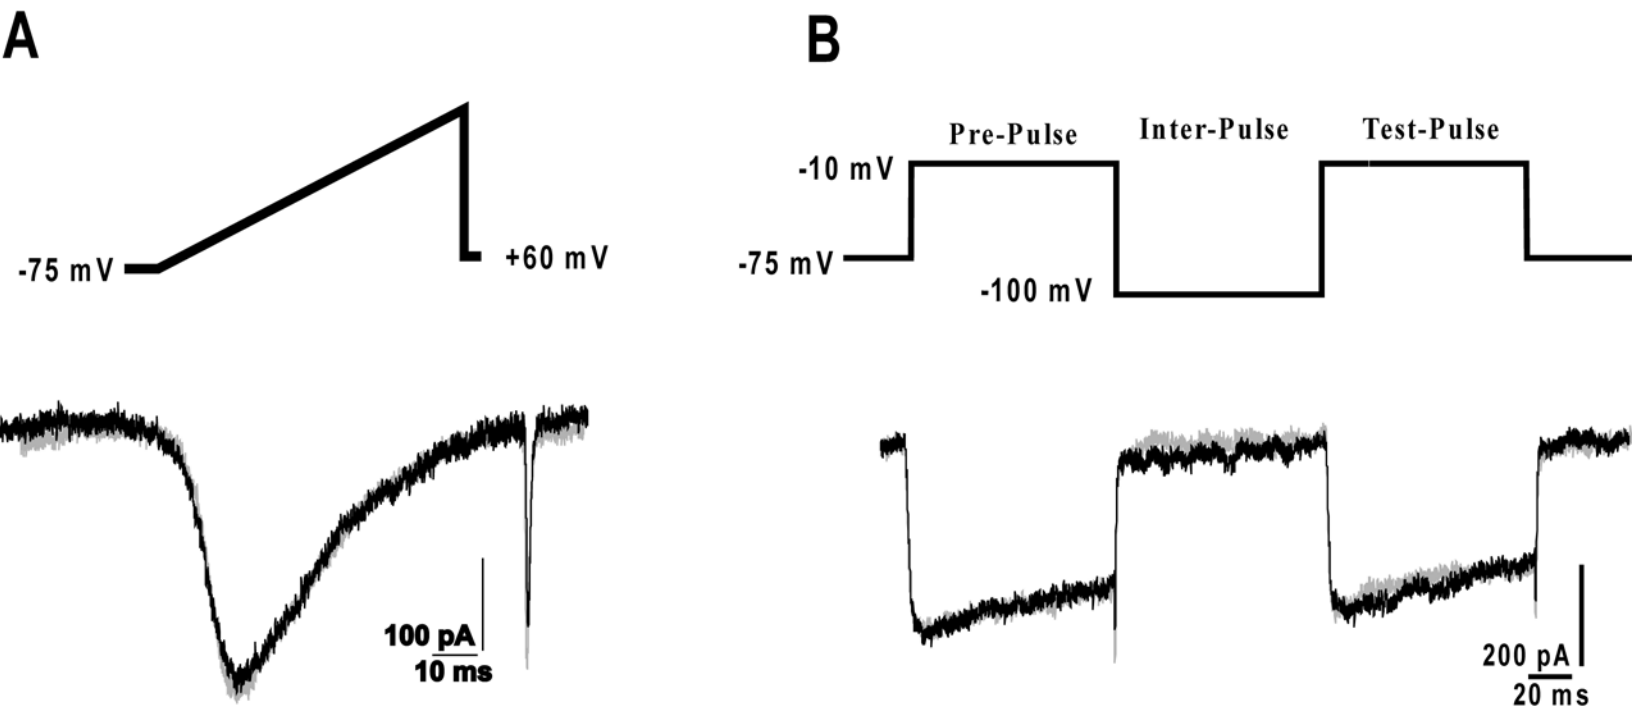

**Supplementary Figure 1:** Lack of effect of Isoleucine on either IpCa amplitudes or inactivation process.

(A) Peak current amplitudes observed for 50 ms depolarizing voltage ramps either in control condition (black traces) or after bath perfusion with Isoleucine 1.5 mM (grey traces,  $n = 3$ ). (B) Inactivation protocol (top) consisting of paired square pulses separated by a voltage step at -100 mV and representative calcium currents (bottom) are shown for control (black) and + Isoleucine 1.5 mM (grey).
